# Supplementary figures and images for: Overlapping genes in the human and mouse genomes
Source: Springer Nature journal article supplement (doi:10.1186/1471-2164-9-169), 2008-04-14

### Human same-strand overlaps

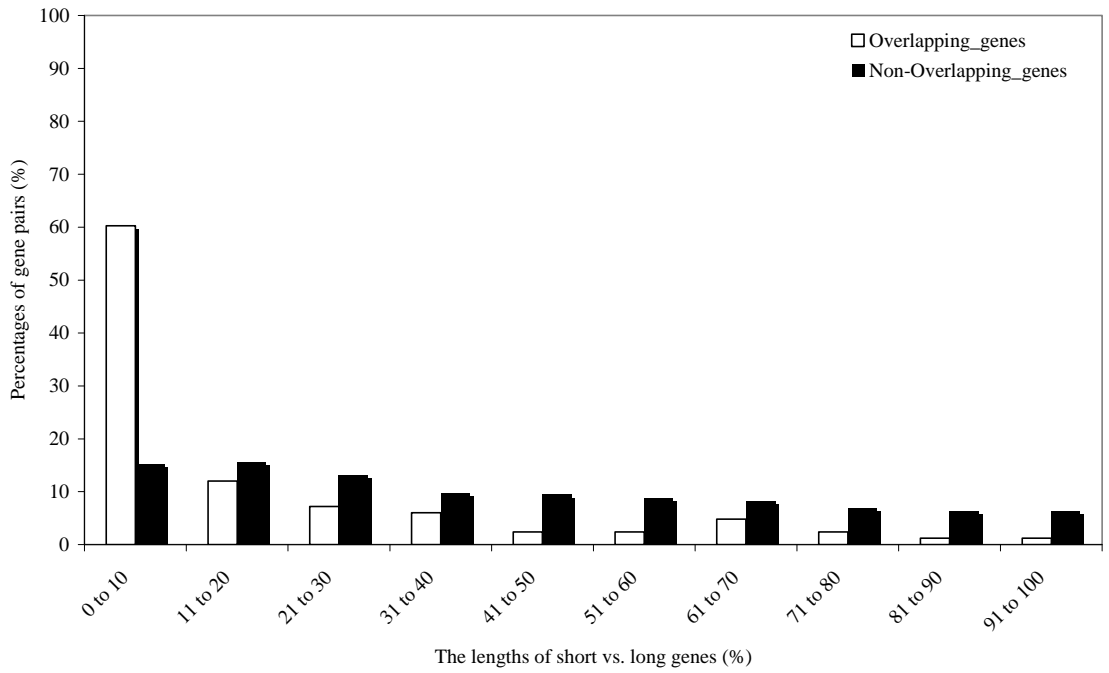

### Human different-strand overlaps

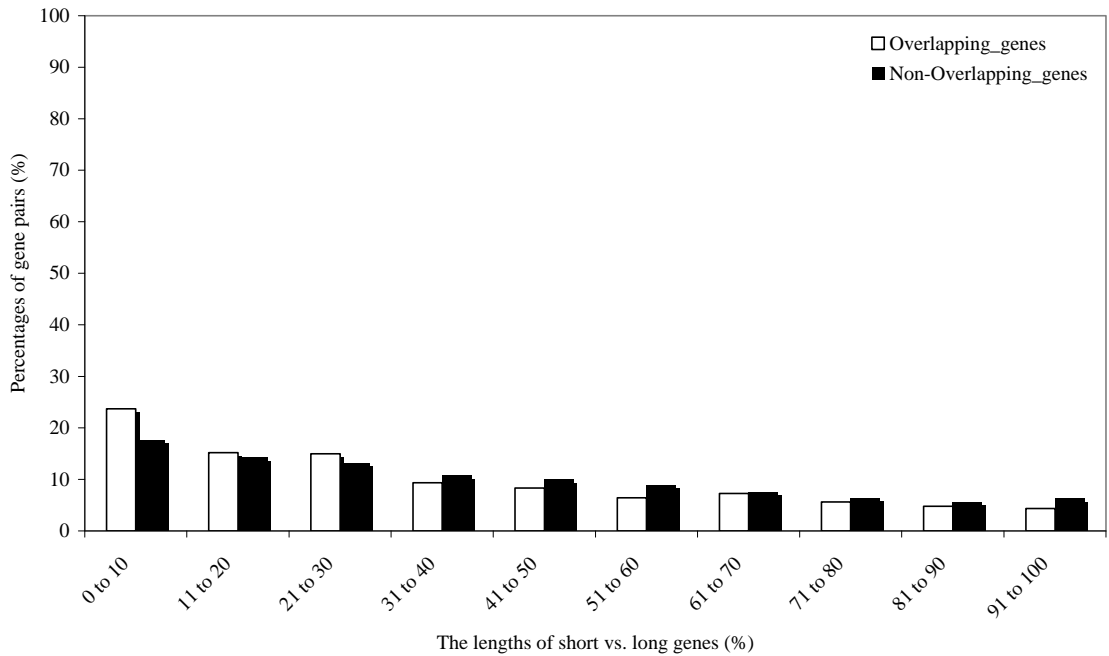

Supplement: 12864_2007_1362_MOESM2_ESM.pdf [file 12864_2007_1362_MOESM2_ESM.pdf]

## Simulation results

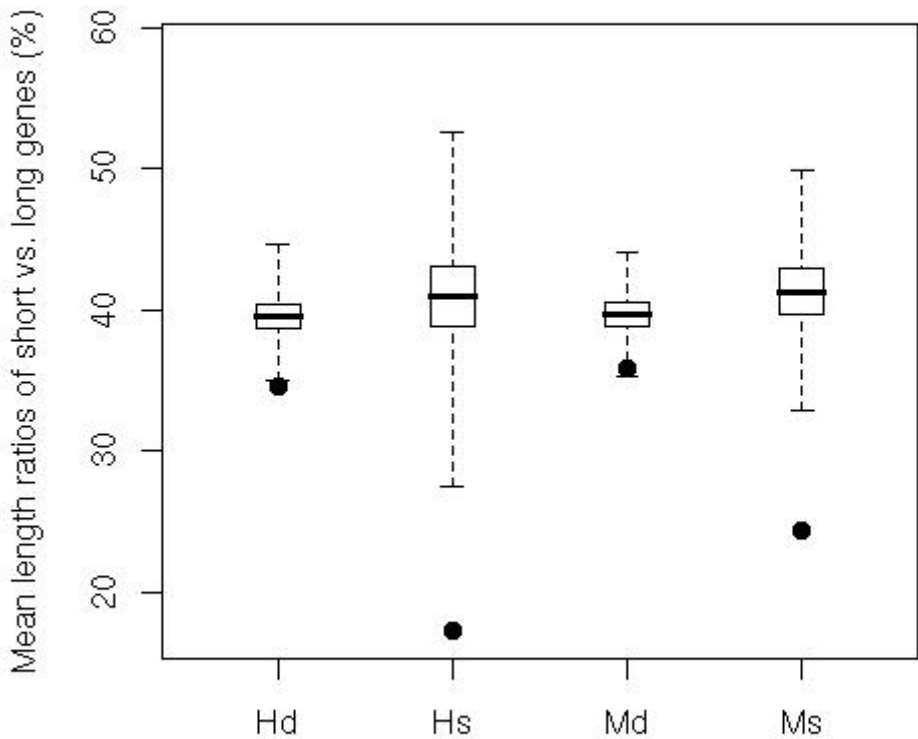

Supplement: 12864_2007_1362_MOESM3_ESM.pdf [file 12864_2007_1362_MOESM3_ESM.pdf]

**Non-overlapping state**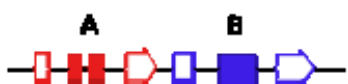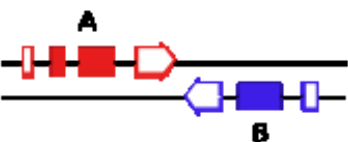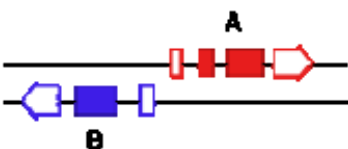**Overlapping state**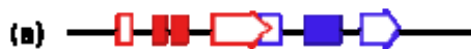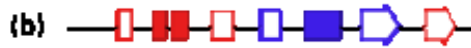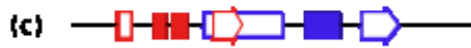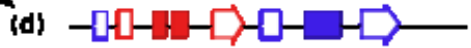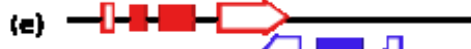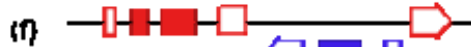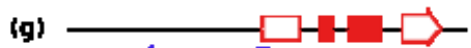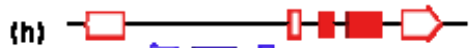

Supplement: 12864_2007_1362_MOESM4_ESM.pdf [file 12864_2007_1362_MOESM4_ESM.pdf]
